# Supplementary material
Source: publisher figshare collection journal article supplement (https://acs.figshare.com/ndownloader/files/5797401)

#### Terms & Conditions

Electronic Supporting Information files are available without a subscription to ACS Web Editions. The American Chemical Society holds a copyright ownership interest in any copyrightable Supporting Information. Files available from the ACS website may be downloaded for personal use only. Users are not otherwise permitted to reproduce, republish, redistribute, or sell any Supporting Information from the ACS website, either in whole or in part, in either machine-readable form or any other form without permission from the American Chemical Society. For permission to reproduce, republish and redistribute this material, requesters must process their own requests via the RightsLink permission system. Information about how to use the RightsLink permission system can be found at <http://pubs.acs.org/page/copyright/permissions.html>

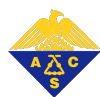

ACS Publications

MOST TRUSTED. MOST CITED. MOST READ.

Copyright © 1997 American Chemical Society

**Supplementary Materials for:****Conformational Study of Succinic and Glutaric  $\beta$ -Alanine Derivatives: Resistance of  $\beta$ -Alanine Amides to Form Intramolecular Hydrogen Bonds****Benjamin W. Gung,\* Zhaohai Zhu**

Department of Chemistry, Miami University, Oxford, Ohio 45056

**Experimental Section**

THF was freshly distilled from sodium benzophenone under  $N_2$ . Hexanes were freshly distilled from calcium hydride under  $N_2$ . Routine  $^1H$  NMR spectra (for characterization) were obtained on a Bruker AC-200 spectrometer. Commercially obtained starting materials were used without further purification. Column chromatography was carried out by using up to 5-psi air pressure with 230-400-mesh silica gel from VWR Scientific. Columns eluted with MeOH in EtOAc were slurry-packed after the slurry was stirred with hexanes. All glassware was dried in an oven at 120 °C.

**Variable-Temperature NMR Procedure.** Unless specifically noted otherwise all NMR experiments were performed using  $CDCl_3$  as solvent. The samples for variable-temperature (VT)  $^1H$  NMR experiments were dried in a desiccator ( $P_2O_5$ ) under vacuum overnight. Deuterated chloroform was dried over activated 4-Å molecular sieves for two days. A 100-mM solution of the amide in  $CDCl_3$  was prepared first and then two 1:9 dilutions with  $CDCl_3$  were performed to give a final concentration of 1 mM. Even with these precautions, the resulting samples typically contained a small peak due to  $H_2O$ .

Variable-temperature NMR measurements were performed on a Bruker AC-300 spectrometer. The VT-NMR experiments all followed a general procedure. The sample tube was placed into the NMR probe using a heavy spinner. The air line responsible for spin was disconnected, and the delivery hose from the liquid nitrogen Dewar was connected to the NMR probe. The air line responsible for lifting the NMR tube and spinner out of the NMR probe was disconnected and the NMR probe was capped. The desired temperature was set on the variable-temperature unit (BVT 2000), and the self-tune procedure was initiated to calibrate the console. Following calibration, the temperature reading on the variable-temperature console was allowed to stabilize. The sample was equilibrated for approximately 10-15 minutes at the set temperature, and after the Z and Z<sup>2</sup> shims were adjusted, a 128-scan spectrum was obtained. Measurements were made in the temperature range of 213-323 K. In these experiments, the first measurement was made at the lowest temperature. Caution was taken to raise the temperature slowly especially when approaching 323 K to avoid the evaporation of the solvent. All chemical shifts were referenced to the signal for residual  $CHCl_3$ , which was assumed to be 7.240 ppm at all temperatures. The accuracy of the temperature display on the VT unit, which was measured from a thermocouple located inside the probe, was tested by

measuring the chemical shifts of methanol. Calibration of the temperature dependence of the separation (in hertz) between the OH resonance and the CH<sub>3</sub> resonance has been reported by Becker. The calibration results show a < 1 K deviation in the temperature range employed.

**Variable-Temperature IR Procedure.** Unless specifically noted otherwise all IR experiments were performed using CDCl<sub>3</sub> as solvent. Amides were dried as described for NMR samples. CDCl<sub>3</sub> solutions were prepared by dissolving several milligrams of amide in solvent that had been dried over molecular sieves and by performing serial dilutions to 1 mM as described for NMR samples. IR measurements were performed on a Perkin Elmer 1600 FT-IR instrument. A Specac variable-temperature cell P/N 21525 equipped with CaF<sub>2</sub> windows (path length = 1.0 mm) was used for variable-temperature experiments. Temperatures were maintained with dry ice-acetone slush bath and were monitored with a thermocouple attached directly to the cell. The cell temperature was allowed to stabilize for 20 min before measurements were obtained, and the cell temperature varied less than 1 °C during data acquisition. Spectra of 128 scans were obtained with 2-cm<sup>-1</sup> resolution. Solvent subtraction was carried out by using background spectra obtained at approximately the same temperatures as the sample spectra.

**Succinylglycyl N-Methylamide Methyl ester (1b).** To a mixture of 30 mL of THF and 25 mL of triethylamine was added 4.19 g (30 mmol) of glycine ethyl ester hydrochloride and 3.10 g (30 mmol) of succinic anhydride. The resulting solution was stirred for 4 h and then concentrated to about 10 mL. The solution was acidified to pH = 2 with 20% hydrochloric acid and then extracted with CH<sub>2</sub>Cl<sub>2</sub>. The combined organic layers were dried over MgSO<sub>4</sub> and the solvent was removed under reduced pressure to give 4.2 g (69%) of monosuccinyl glycine ethyl ester as a white solid: <sup>1</sup>H NMR (CDCl<sub>3</sub>) δ 1.25 (t, *J* = 7.2 Hz, 3H, CH<sub>3</sub>), 2.56 (t, *J* = 5.8 Hz, 2H, CH<sub>2</sub>), 2.68 (t, *J* = 5.7 Hz, 2H, CH<sub>2</sub>), 4.00 (d, *J* = 5.1 Hz, 2H, NCH<sub>2</sub>), 4.18 (q, *J* = 7.1 Hz, 2H, OCH<sub>2</sub>), 6.55 (s, 1H, NH), 8.87 (broad, 1H, CO<sub>2</sub>H). This material was carried on without further purification.

A pressure-resistant glass tube was loaded with a solution of 2.03 g (10 mmol) of the ester in 10 mL of THF and was cooled to -78°C. Anhydrous methyl amine was added into the solution through a long stainless-steel needle and a Tygon tubing from a lecture bottle until the volume of the solution increased about 2 mL. The pressure tube was sealed and warmed up to room temperature slowly. The mixture was stirred for one week. After being cooled to -78°C, the seal was opened and the excess methylamine and the solvent were removed under reduced pressure to give 2.12 g (97%) of the corresponding N-methyl amide (as its ammonium salt) as a white solid: <sup>1</sup>H NMR (DMSO) δ 2.22 (t, *J* = 4.0 Hz, 2H, CH<sub>2</sub>), 2.23 (t, *J* = 3.9 Hz, 2H, CH<sub>2</sub>), 2.31 (s, 3H, CH<sub>3</sub>), 2.53 (d, *J* = 4.6 Hz, 3H, CH<sub>3</sub>), 3.56 (d, *J* = 5.9 Hz, 2H, CH<sub>2</sub>), 4.78 (broad, 3H, MeNH<sub>3</sub><sup>+</sup>), 8.16 (q, *J* = 4.1 Hz, 1H, NH), 8.26 (t, *J* = 5.8 Hz, 1H, NH). This material was carried on without further purification.

To a solution of 2.12 g (9.7 mmol) of the ammonium carboxylate in 10 mL of methanol was added 2.58 g (13.4 mmol) of *p*-toluenesulfonic acid monohydrate. The resulting solution was cooled to 0 °C and

then added ethereal diazomethane. The completion of the reaction was monitored by TLC (20% MeOH/EtOAc). The mixture was concentrated and purified by column chromatography and eluted with 20% MeOH in EtOAc to give 1.14 g (58%) of the corresponding diamide ester (**1b**) as a white solid (m.p. 115-125 °C):  $^1\text{H}$  NMR ( $\text{CDCl}_3$ )  $\delta$  2.48 (t,  $J = 6.7$  Hz, 2H,  $\text{CH}_2$ ), 2.71 (t,  $J = 6.6$  Hz, 2H,  $\text{CH}_2$ ), 2.79 (d,  $J = 4.8$  Hz, 3H,  $\text{NCH}_3$ ), 3.67 (s, 3H,  $\text{OCH}_3$ ), 3.91 (d,  $J = 5.7$  Hz, 2H,  $\text{NCH}_2$ ), 6.55 (broad at r.t., triplet at 213 K, 1H, NH), 6.62 (broad at r.t., quartet at 213 K, 1H, NH).

Diamide esters **2b**, **3b**, and **4b** are prepared using similar procedures starting from glutaric anhydride and glycine, succinic anhydride and  $\beta$ -alanine, and glutaric anhydride and  $\beta$ -alanine, respectively.

**N,N-Dimethylamino Succinyl  $\beta$ -Alanyl N-Methylamide (3a).** A pressure-resistant glass tube was loaded with 0.90 g (4.2 mmol) of the diamide ester (**3b**) and cooled to  $-78^\circ\text{C}$ . Anhydrous dimethylamine was added through a long stainless-steel needle and a Tygon tubing from a lecture bottle until the volume of the solution increased about 5 mL. The tube was sealed and warmed up to room temperature slowly. The mixture was stirred for one week. After being cooled to  $-78^\circ\text{C}$ , the seal was opened and the excess dimethylamine and the solvent were removed under reduced pressure to give 1.00 g (100%) of the desired triamide **3a** as a white solid (m.p. 100-115 °C) :  $^1\text{H}$  NMR ( $\text{CDCl}_3$ )  $\delta$  2.36 (t,  $J = 6.7$  Hz, 2H,  $\text{CH}_2$ ), 2.43 (t,  $J = 5.9$  Hz, 2H,  $\text{CH}_2$ ), 2.63 (t,  $J = 6.1$  Hz, 2H,  $\text{CH}_2$ ), 2.76 (d,  $J = 4.7$  Hz, 3H,  $\text{CH}_3$ ), 2.90 (s, 3H,  $\text{CH}_3$ ), 2.99 (s, 3H,  $\text{CH}_3$ ), 3.47 (dt,  $J = 6.4$  Hz, 5.3 Hz, 2H,  $\text{NCH}_2$ ), 6.50 (broad at r.t., triplet at 213 K, 1H, NH), 6.62 (broad at r.t., quartet at 213 K, 1H, NH);  $^{13}\text{C}$  NMR ( $\text{CDCl}_3$ )  $\delta$  26.2, 28.7, 31.2, 35.4, 36.0, 36.1, 37.0, 171.9, 172.3, 172.9; IR (1 mM in  $\text{CDCl}_3$ ) 3457 (NH), 3351 (broad, NH), 1662 ( $\text{C}=\text{O}$ ), 1639 ( $\text{C}=\text{O}$ )  $\text{cm}^{-1}$ .

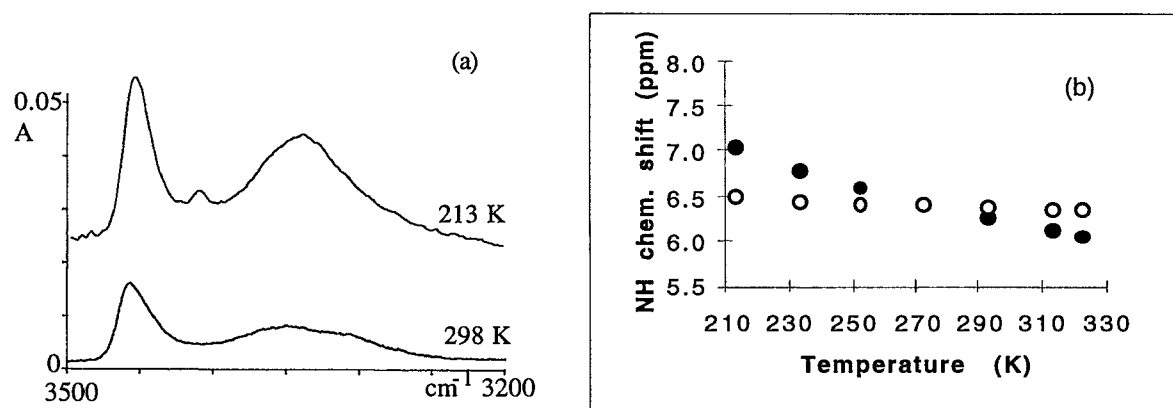

**Figure 5.** (a) NH stretch region of the IR spectra at 213 K and 298 K for N,N-dimethylamino succinyl  $\beta$ -alanyl N-methylamide, **3a**. The sharp band at 3451-3457  $\text{cm}^{-1}$  is assigned to the free NH stretch and the broad band at 3337-3351  $\text{cm}^{-1}$  to the intramolecularly hydrogen-bonded NH. (b) Amide proton NMR chemical shifts as a function of temperature for triamide **3a**. Internal NH (o,  $\Delta\delta\text{NH}/\Delta T = -1.2$  ppb/K). Terminal NH (•,  $\Delta\delta\text{NH}/\Delta T = -8.7$  ppb/K).

A-74

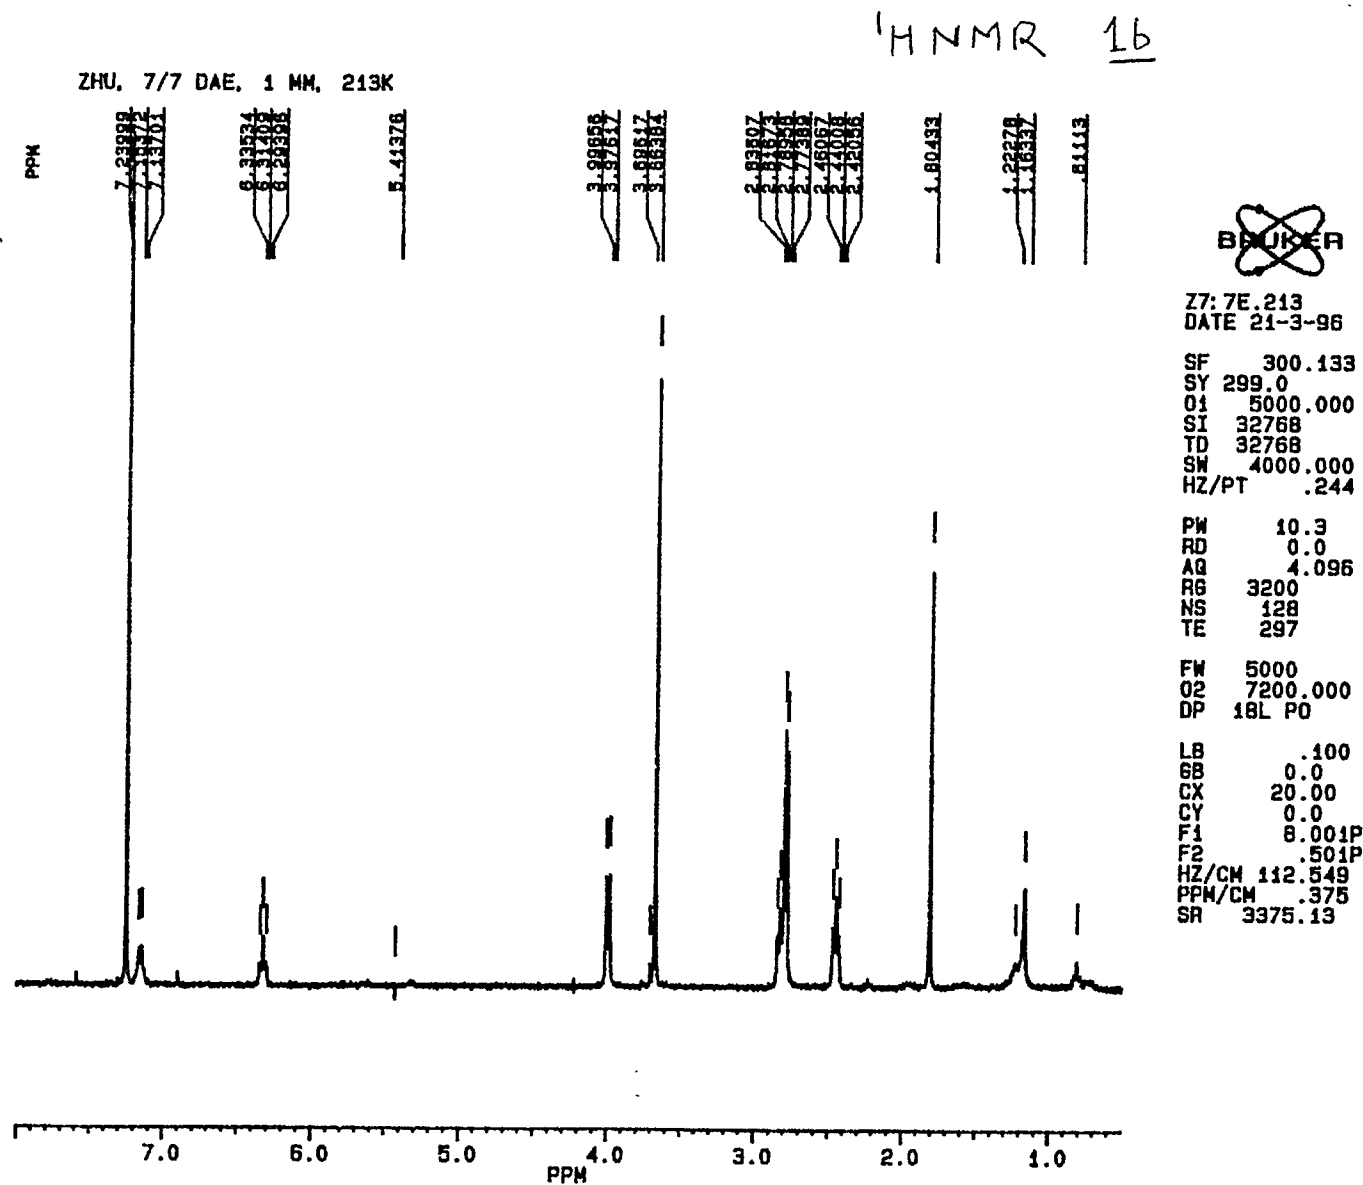

ZHU, 7/8DAE, 213K, 1 MM

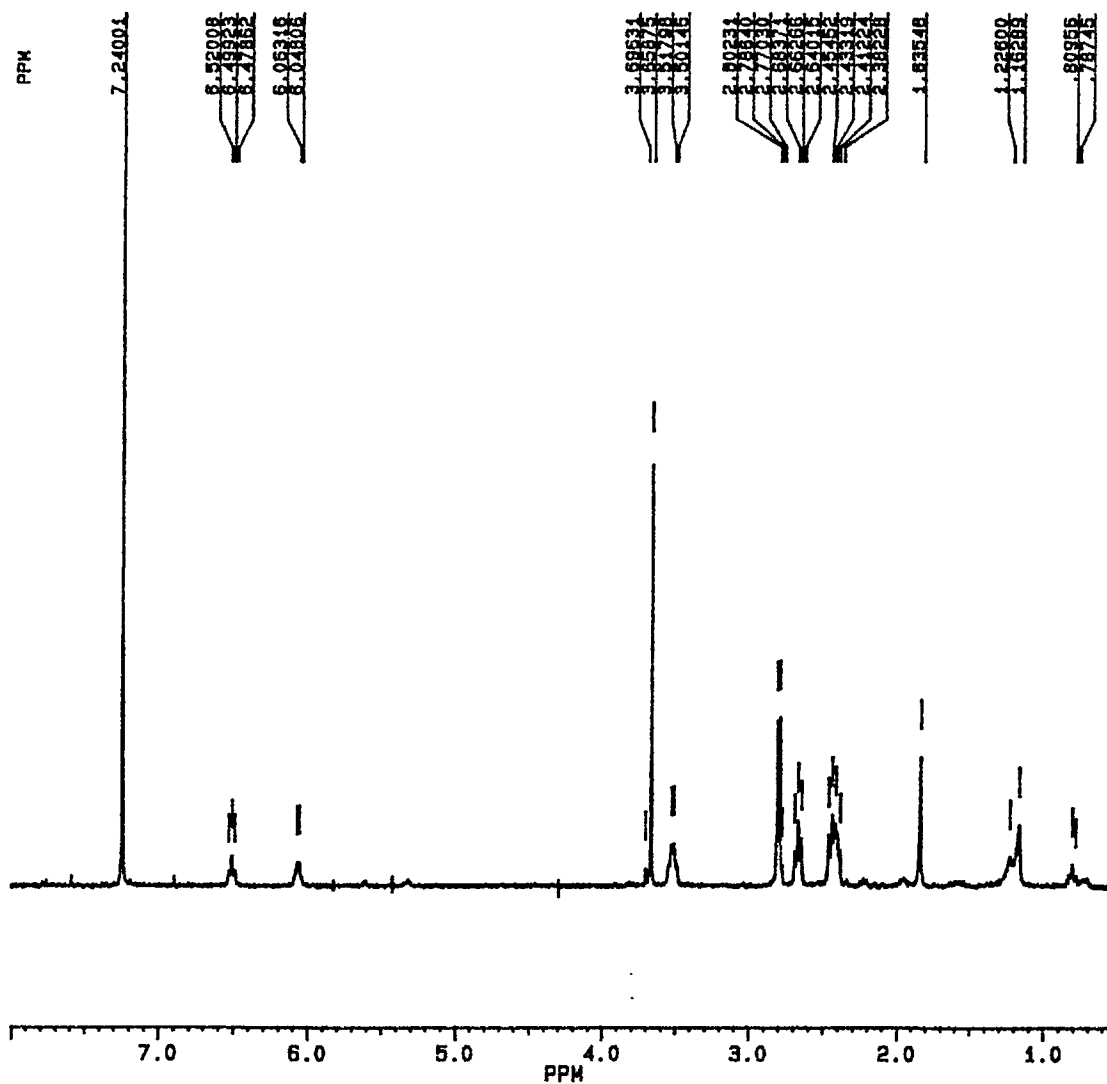

E98.323  
DATE 14-6-96

|       |          |
|-------|----------|
| SF    | 300.133  |
| SY    | 299.0    |
| OI    | 5000.000 |
| SI    | 32768    |
| TD    | 32768    |
| SW    | 4000.000 |
| HZ/PT | .244     |

|    |       |
|----|-------|
| PW | 10.3  |
| RD | 0.0   |
| AG | 4.096 |
| RG | 800   |
| NS | 128   |
| TE | 297   |

```
FW      5000
02      7200.000
DP      18L PO
```

|        |         |
|--------|---------|
| LB     | .100    |
| GB     | 0.0     |
| CX     | 20.00   |
| CY     | 0.0     |
| F1     | 8.001P  |
| F2     | .501P   |
| HZ/CM  | 112.549 |
| PPM/CM | .375    |
| SR     | 3374.64 |

A-14

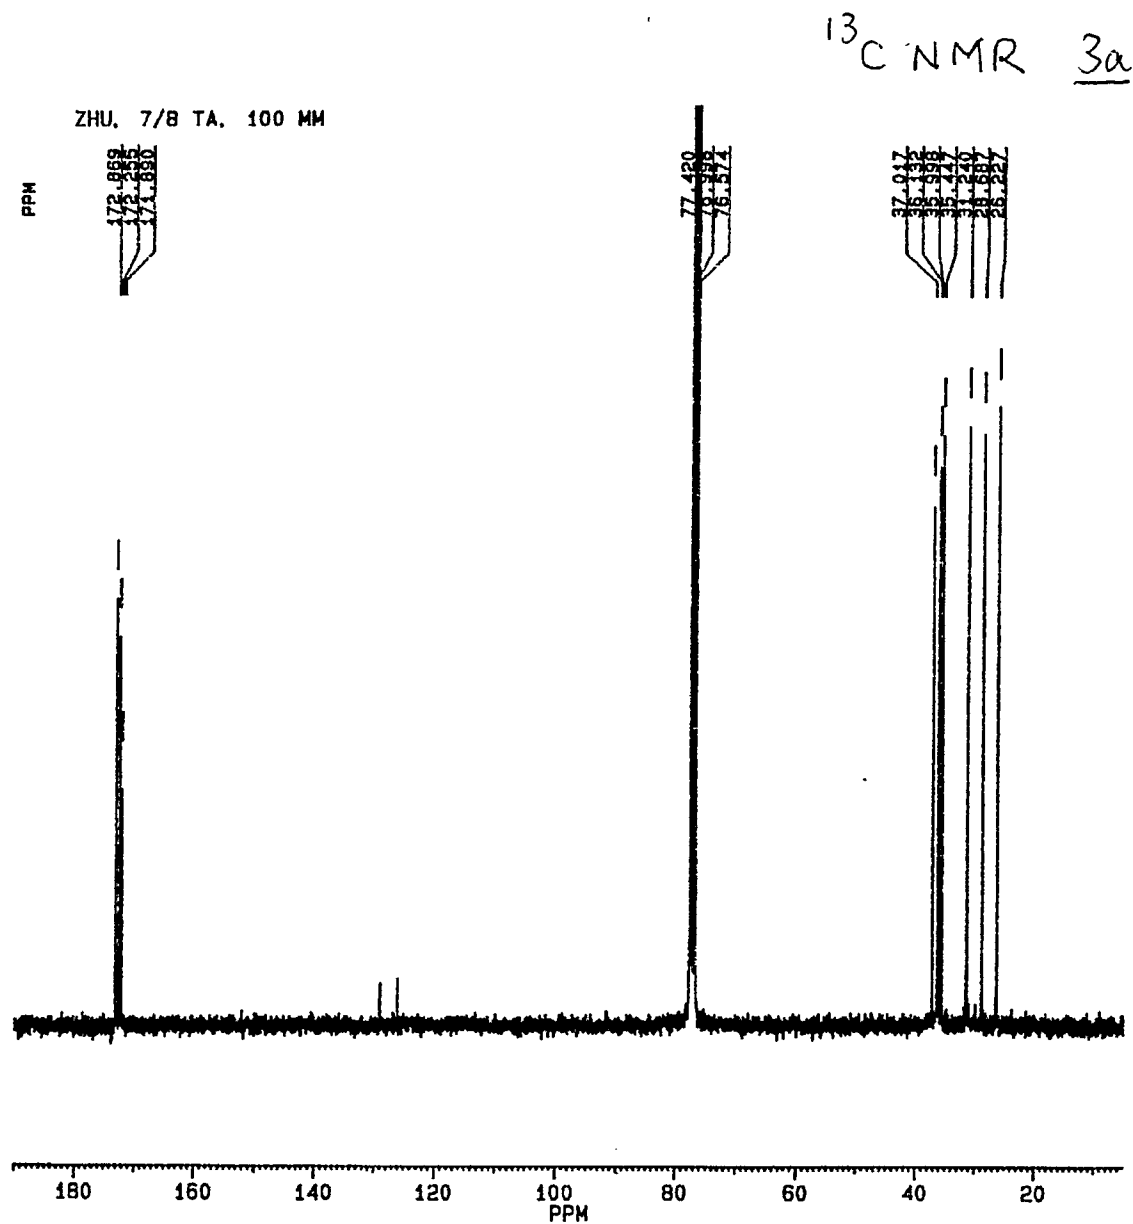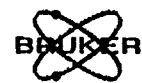

Z7: 8.C  
DATE 2-3-96

SF 75.469  
SY 75.0  
Q1 7000.000  
SI 32768  
TD 32768  
SN 20000.000  
HZ/PT 1.221

PW 2.0  
RD 1.000  
AQ .819  
RG 200  
NS 17952  
TE 297

FW 25000  
Q2 5000.000  
DP 20L CPD

LB 1.000  
GB 0.0  
CX 20.00  
CY 0.0  
F1 189.998P  
F2 5.005P  
HZ/CM 698.059  
PPM/CM 9.250  
SR -1402.63

A-11

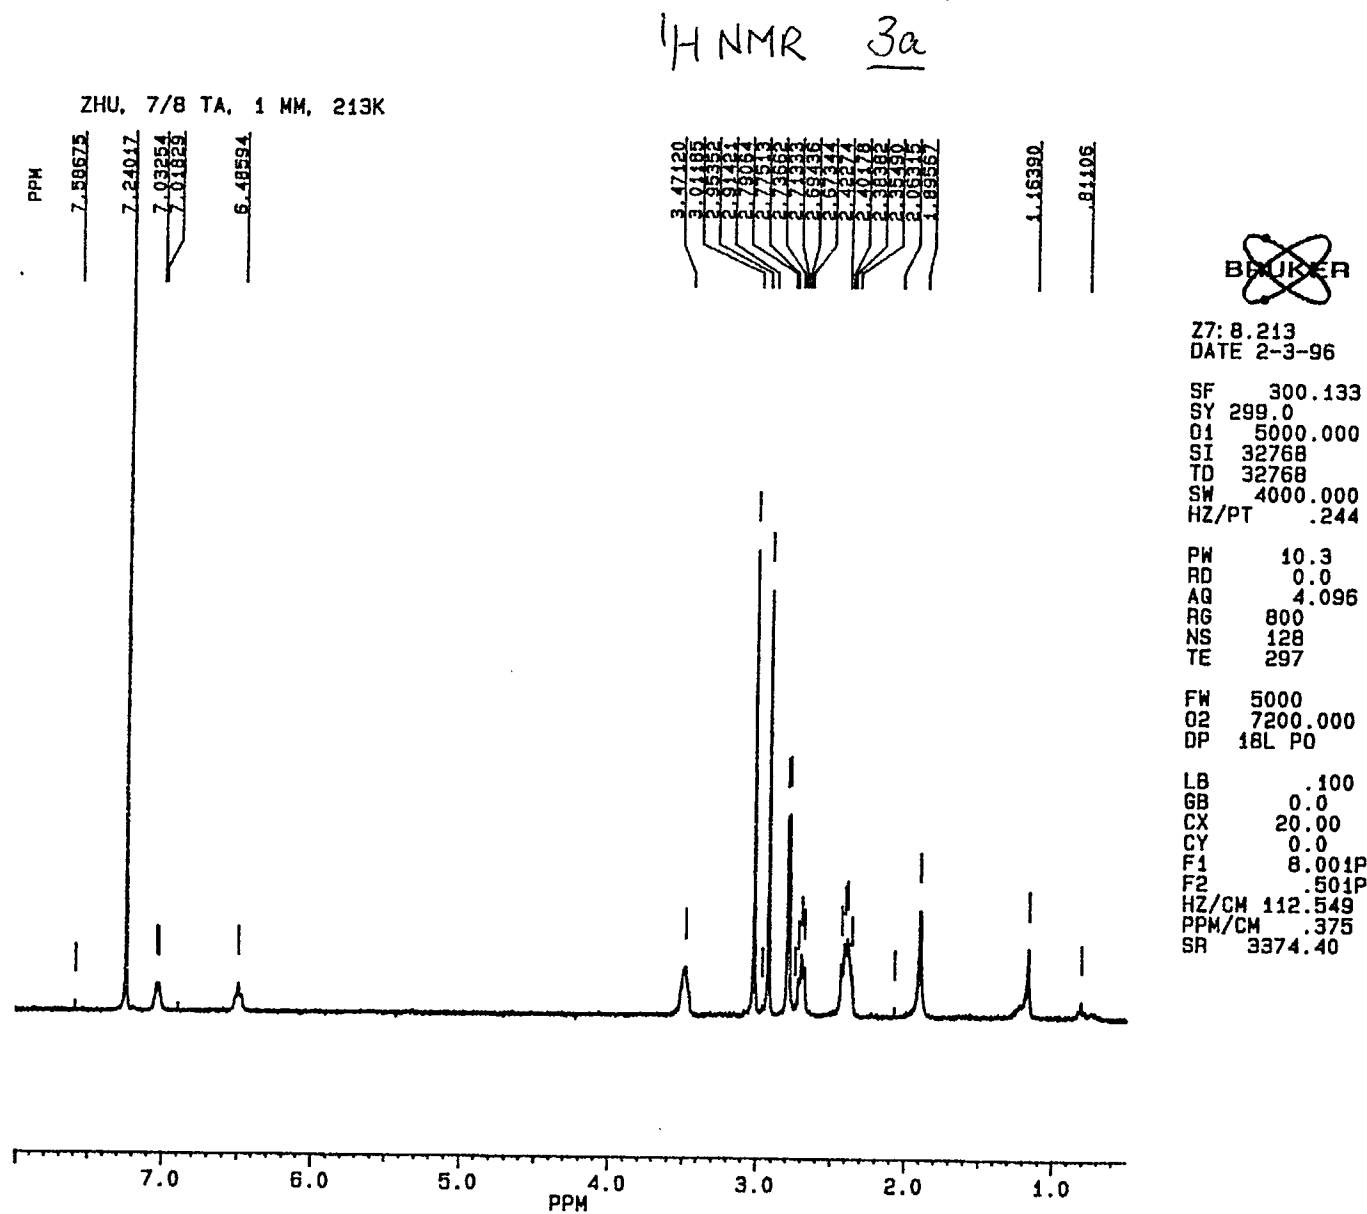



$^1\text{H NMR}$  3b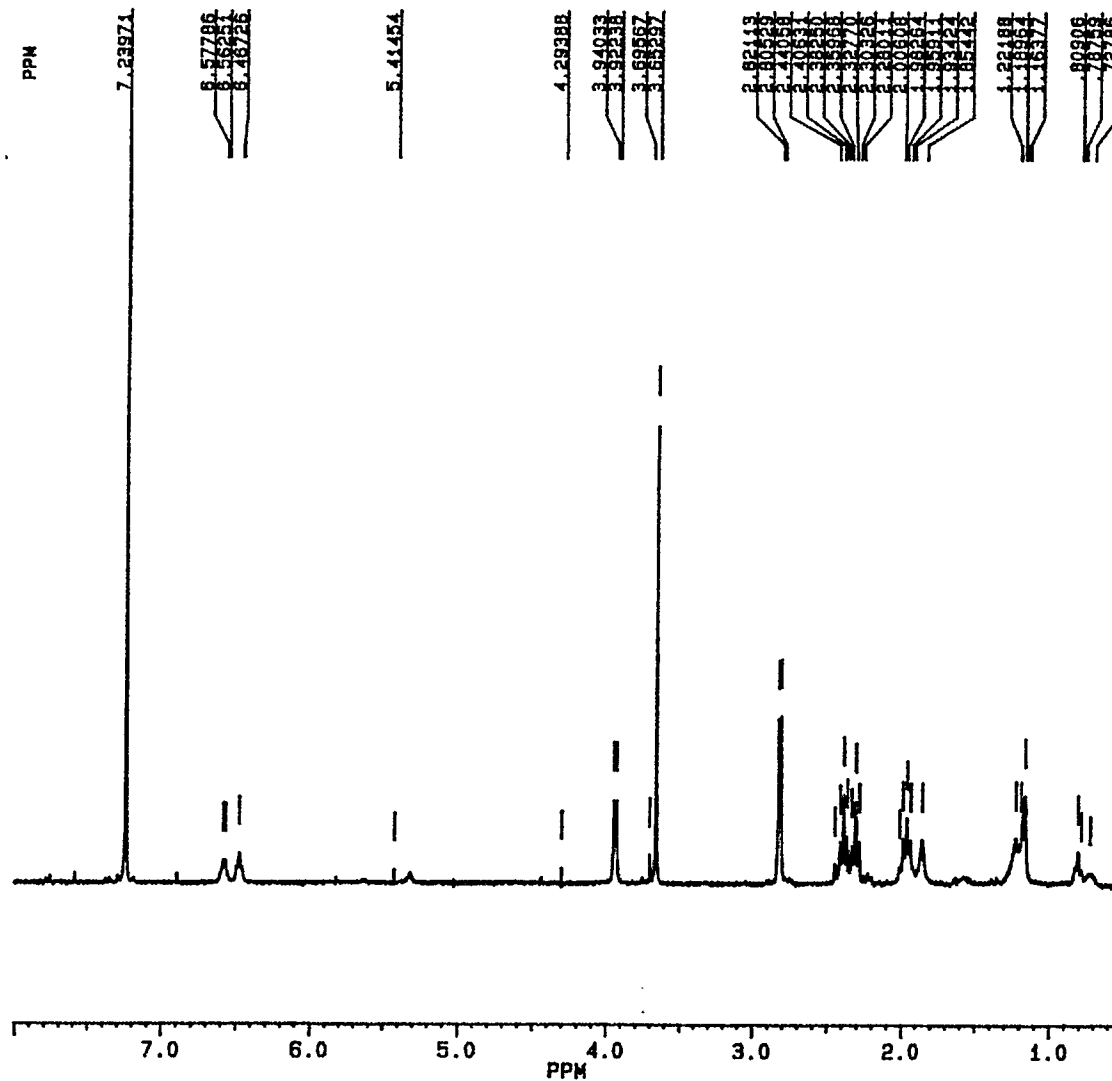

E79.323  
DATE 20-6-96

|       |          |
|-------|----------|
| SF    | 300.133  |
| SY    | 299.0    |
| O1    | 5000.000 |
| SI    | 32768    |
| TD    | 32768    |
| SW    | 4000.000 |
| HZ/PT | .244     |

|    |       |
|----|-------|
| PW | 10.3  |
| RD | 0.0   |
| AQ | 4.096 |
| RG | 400   |
| NS | 128   |
| TE | 297   |

```
FW      5000
02      7200.000
DP      18L P0
```

|        |         |
|--------|---------|
| LB     | .100    |
| GB     | 0.0     |
| CX     | 20.00   |
| CY     | 0.0     |
| F1     | 8.001P  |
| F2     | .501P   |
| HZ/CM  | 112.549 |
| PPM/CM | .375    |
| SR     | 3374.89 |

A-94

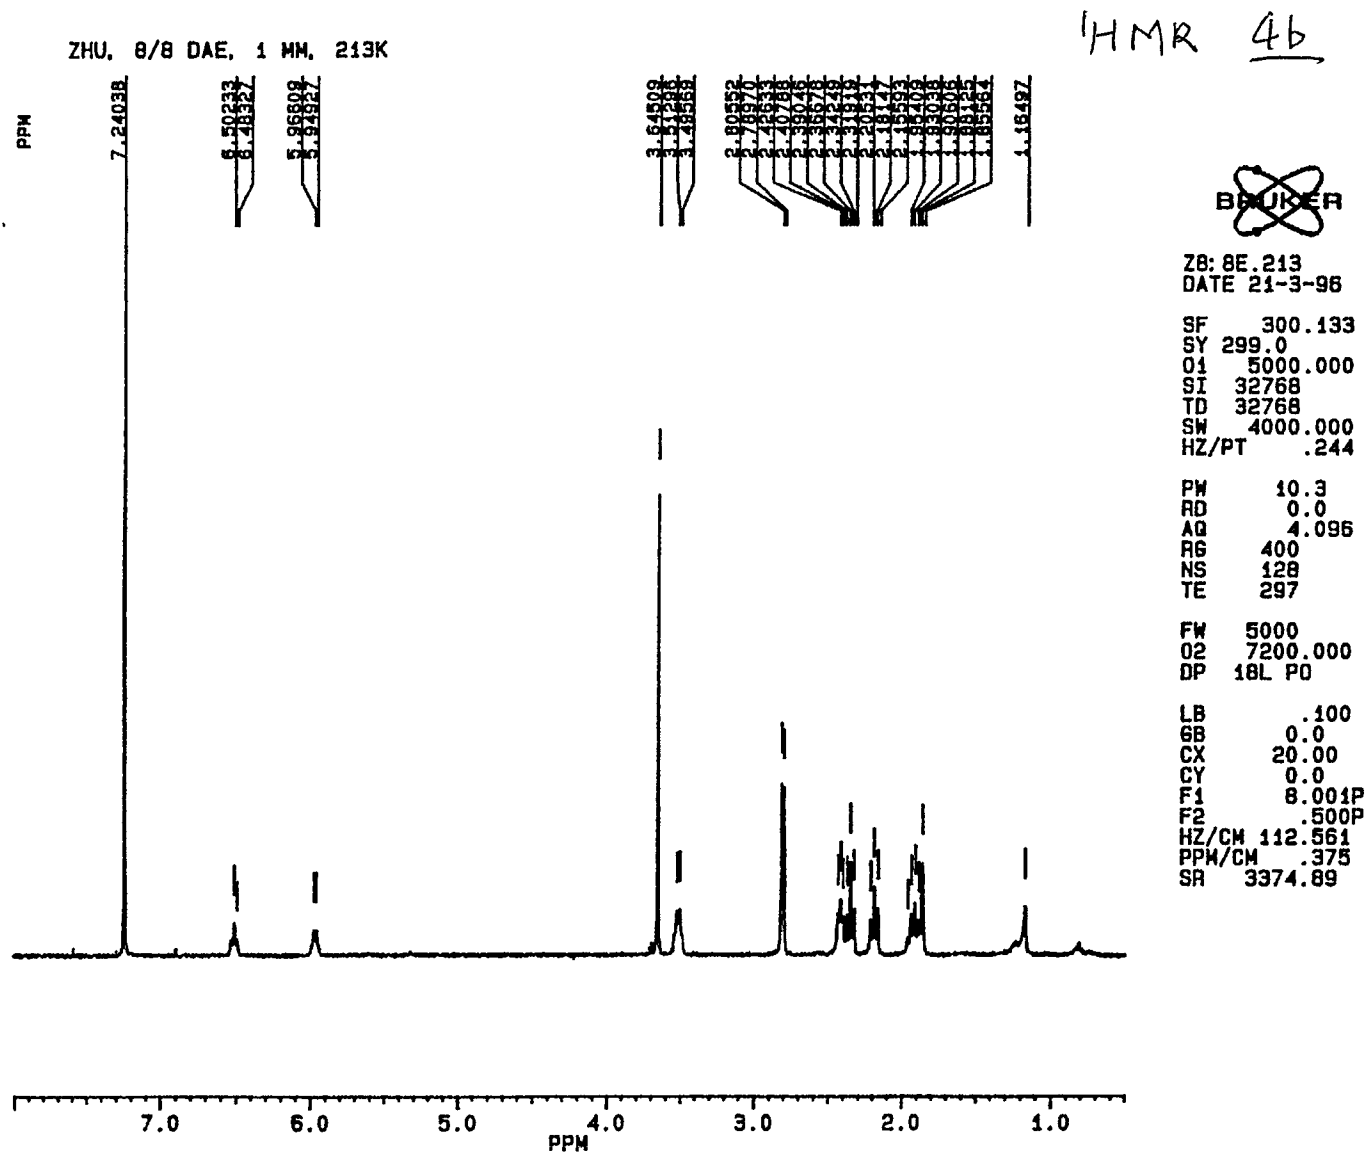

Supplement: Supplementary file 1 [file 5797401]
